# Supplementary material
Source: PubMed Central journal article supplement (PMC5122316)
Supplement: NIHMS829354-supplement-Supplemental.pdf [file NIHMS829354-supplement-Supplemental.pdf]

## SUPPLEMENTARY INFORMATION

### **The structure of a thermophilic kinase shapes fitness upon random circular permutation**

Alicia M. Jones<sup>1</sup>, Manan M. Mehta<sup>2</sup>, Emily E. Thomas<sup>1</sup>, Joshua T. Atkinson<sup>3</sup>, Thomas H. Segall-Shapiro<sup>4</sup>, Shirley Liu<sup>1</sup>, and Jonathan J. Silberg<sup>1,\*</sup>

Author affiliations:

1. Department of Biosciences, Rice University, MS-140, 6100 Main Street, Houston, TX, 77005
2. Medical Scientist Training Program, Northwestern University, 303 East Chicago Avenue, Morton 1-670, Chicago, IL, 60611
3. Systems, Synthetic, and Physical Biology Graduate Program, Rice University, 6100 Main MS-180, Houston, Texas 77005
4. Department of Biological Engineering, Synthetic Biology Center, Massachusetts Institute of Technology, 500 Technology Square, NE47-257, Cambridge, MA, 02139

\*To whom correspondence should be addressed. Jonathan J. Silberg, Biosciences Department, 6100 Main Street GBH W200-I, Houston TX 77005; Tel: 713-348-3849; Fax: 713-348-5154; Email: [joff@rice.edu](mailto:joff@rice.edu)

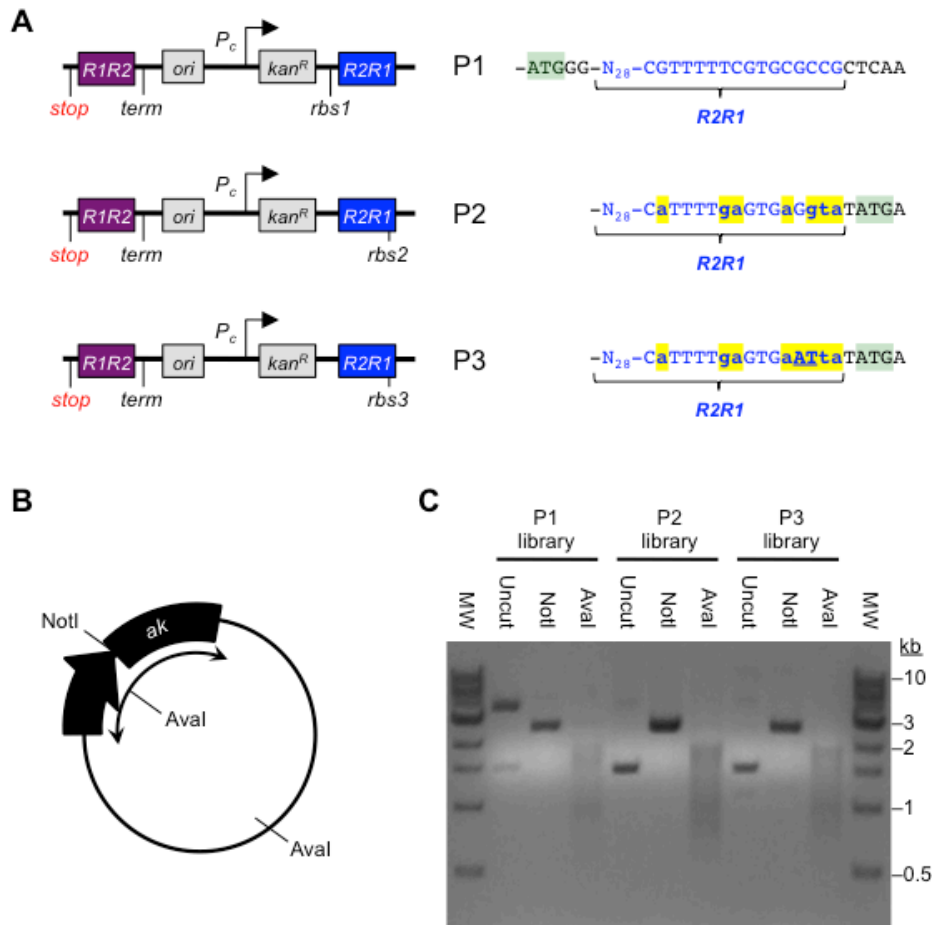

**Figure S1.** Permuteposons used to create libraries. **(A)** The architecture of each permuteposon. The start codon designed to initiate translation of open reading frames encoding permuted proteins is shown in green, the transposase recognition sequences (R1R2 and R2R1) are shown in purple and blue, and the mutations introduced into R2R1 are shown in yellow. Mutations in P3 that differ from P2 are underlined. **(B)** The different vectors created by PERMUTE contain a single NotI site within the sequence that connects the permuted *TnAK* gene fragments and two Aval sites. One of the Aval sites is within the permuteposon, while the other is within the permuted *TnAK* genes. **(C)** When treated with NotI, all three libraries yield a single band at the expected molecular weight of linear permuteposons fused to the *TnAK* gene (2.5 kb). When treated with Aval, the three libraries yield smears whose length varies from 600 to 1900 base pairs. This smear is expected to occur when libraries contain many of the possible variants because the distance between the two Aval sites within different vectors depends on the location where the *TnAK* gene is permuted.

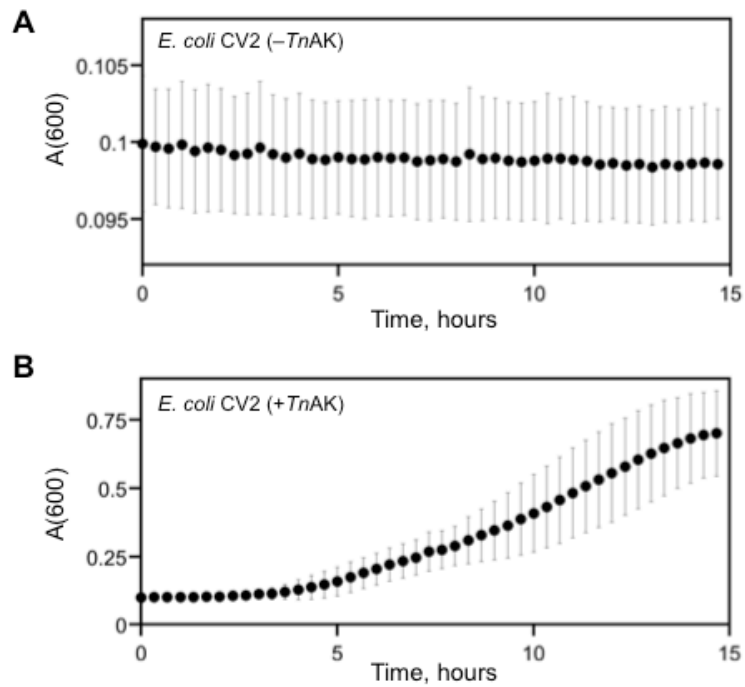

**Figure S2.** Assessing AK function using bacterial complementation. The absorbance at 600 nm of *E. coli* CV2 cells transformed with (A) circularized P1 is compared with cells transformed with (B) P1 that expresses *TnAK*. Cell growth was performed at 42°C, and data are reported as the mean  $\pm 1\sigma$  ( $n \geq 28$ ).

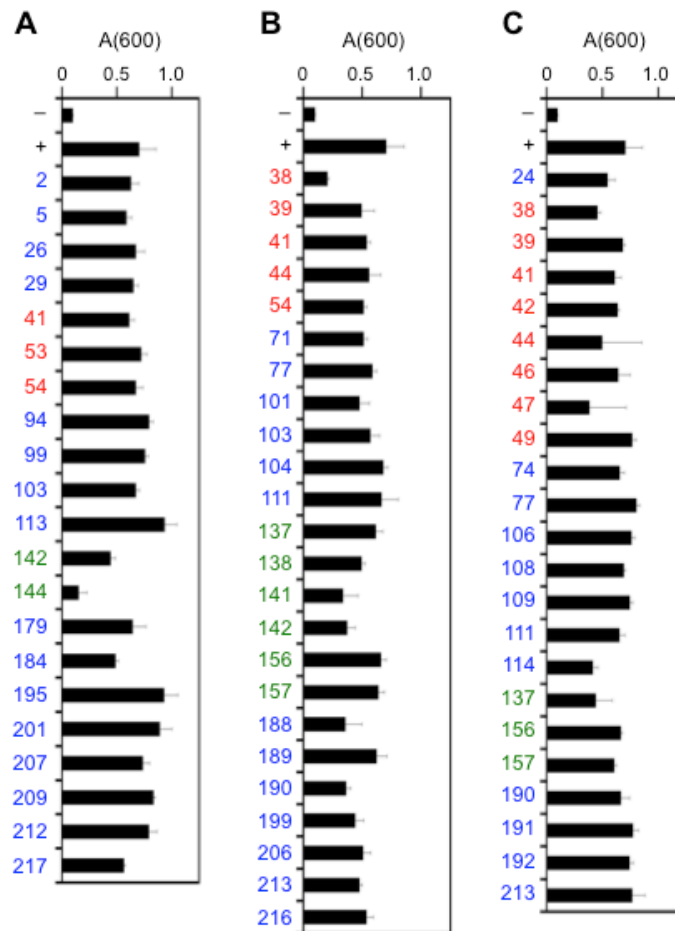

**Figure S3.** Complementation strength of variants selected from each library. For the (A) P1, (B) P2, and (C) P3 libraries, the absorbance at 600 nm of *E. coli* CV2 cultures after 15 hours of growth at 42°C is reported for cells transformed with circularized P1 (-*ctrl*), P1 that expresses *TnAK* (+*TnAK*), and P1, P2, and P3 permuteposons expressing permuted proteins selected from each library. Permuted AK are named based on the *TnAK* codon that occurs at the beginning of each permuted gene, and names are colored red (AMP binding), blue (core), and green (lid) based on the domain location of the residue at their N-terminus. Data are reported as the mean  $\pm 1\sigma$  ( $n \geq 4$ ). A(600) represents the absorbance obtained at 600 nm after 15 hours of growth. All variants displayed significant growth compared to the negative control (t-test;  $p < 0.05$ ) except 144 in the P1 library and 44 and 47 in the P3 library. Because the growth conditions (42°C for 15 hours) were more stringent than the original selections (40°C for 48 hours), we performed measurements with these three variants at 40°C. Analysis of *E. coli* CV2 complementation by these three variants at 40°C revealed significant growth after 15 hours ( $p < 0.001$ ).

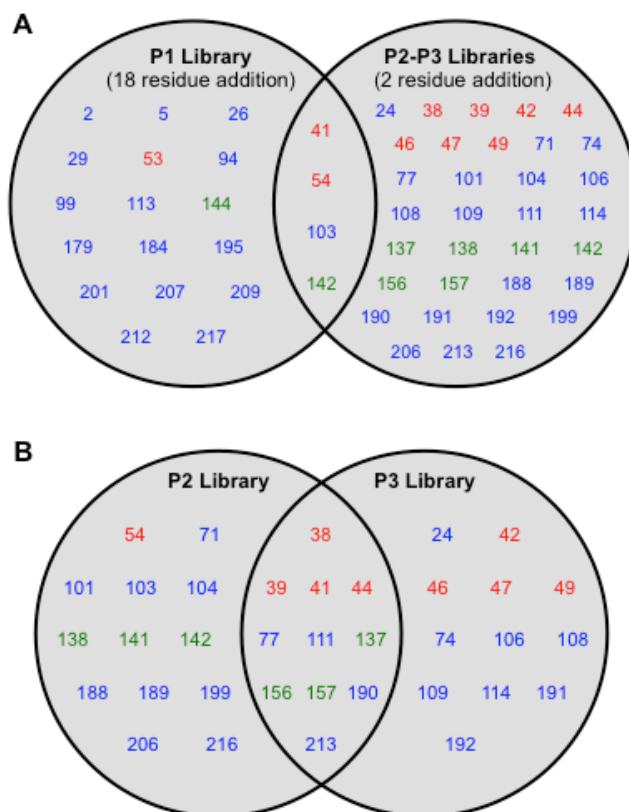

**Figure S4.** Comparison of permuted *TnAK* discovered in each library. **(A)** Comparison of the functional permuted *TnAK* selected from libraries that amend small versus large peptides to the N-terminus of permuted proteins. **(B)** A comparison of variants selected from the P2 and P3 libraries, which express identical variants using different RBSs. Variants are named based on the *TnAK* codon that occurs at the beginning of each permuted gene, and names are colored red (AMP binding), blue (core), and green (lid) based on the domain location of the residue at their N-terminus.

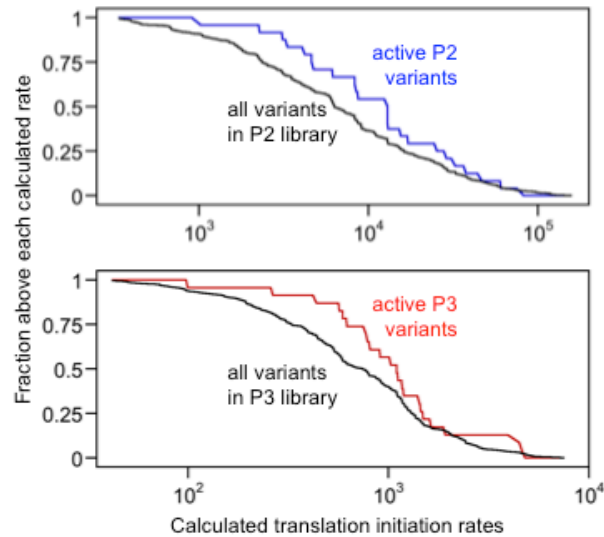

**Figure S5.** Translation initiation rates calculated using intended and alternative start codons. The relative expression of each permuted *TnAK* was estimated by summing the translation initiation rates at the intended start codon and alternative in frame start codons. Previous studies have shown that *TnAK* retains activity upon removal of more than twenty residues at its termini, suggesting that some permuted *TnAK* variants can be expressed as truncations from alternative translation initiation sites without loss of protein function. The fraction of active P2 and P3 variants above each calculated threshold for translation initiation was compared with the fraction of total possible variants to visualize the enrichment of active permuted proteins over that expected in the absence of enrichment. Application of a one-tailed Mann-Whitney-Wilcoxon test yielded a >98% probability that the median expression for active permuted *TnAK* in the P2 library (and P3 library) is greater than the median expression for all theoretically possible variants in each library.

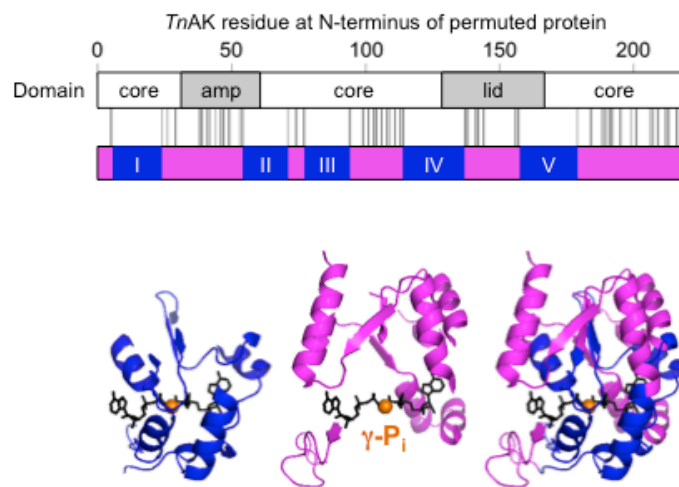

**Figure S6.** Mapping peptides I-V onto AK structure. The AK structure shows the proximity of residues within peptides I-V (blue) to the  $\gamma$ -P<sub>i</sub> (orange) within Ap5A, an inhibitor that has been used to model the catalytic transition state.

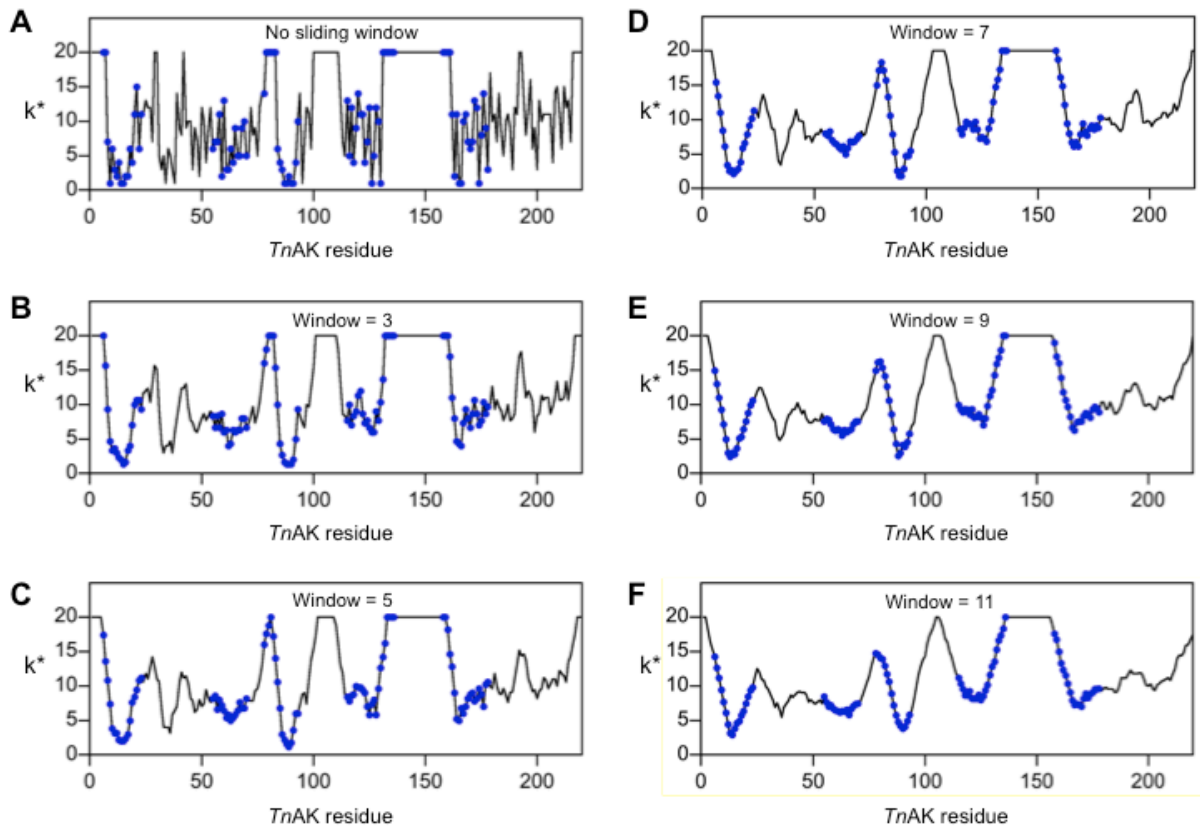

**Figure S7.** Mutational tolerance ( $k^*$ ) calculated using a multiple sequence alignment.  $k^*$  is shown for sliding windows of (A) 1, (B) 3, (C) 5, (D) 7, (E) 9, and (F) 11 residues. When windows were applied,  $k^*$  for a residue site was calculated as the mean  $k^*$  from a window of residues centered on each native position. The *TnAK* residues that correspond to peptides I-V, which lacked backbone fission sites in combinatorial experiments, are mapped in blue on each profile.



### AK with Ap5A structures

| Organism                              | PDB  | NH2 | COOH |
|---------------------------------------|------|-----|------|
| <i>Geobacillus stearothermophilus</i> | 1ZIN | 1   | 217  |
| <i>Bacillus subtilis</i>              | 1P3J | 1   | 212  |
| <i>Bacillus globisporus</i>           | 1S3G | 1   | 217  |
| <i>Escherichia coli</i>               | 1AKE | 1   | 214  |
| <i>Saccharomyces cerevisiae</i>       | 1AKY | 3   | 220  |
| <i>Streptococcus pneumoniae</i>       | 4NU0 | 1   | 212  |
| <i>Aquifex aeolicus</i>               | 2RGX | 1   | 203  |
| <i>Marinabacillus marinus</i>         | 3FB4 | 1   | 215  |
| <i>Zea mays</i>                       | 1ZAK | 3   | 222  |
| <i>Homo sapiens</i>                   | 2C95 | 0   | 195  |

### Pairwise sequence identity

| TnAK | 1ZIN | 1P3J | 1S3G | 1AKE | 1AKY | 4NU0 | 2RGX | 3FB4 | 1ZAK | 2C95 |     |
|------|------|------|------|------|------|------|------|------|------|------|-----|
| 46%  | 1ZIN | ---  | 75%  | 68%  | 45%  | 42%  | 53%  | 45%  | 73%  | 40%  | 32% |
| 50%  | 1P3J | ---  | ---  | 69%  | 47%  | 43%  | 57%  | 45%  | 71%  | 39%  | 32% |
| 43%  | 1S3G | ---  | ---  | ---  | 50%  | 44%  | 53%  | 46%  | 74%  | 38%  | 31% |
| 43%  | 1AKE | ---  | ---  | ---  | ---  | 46%  | 39%  | 44%  | 48%  | 42%  | 35% |
| 41%  | 1AKY | ---  | ---  | ---  | ---  | ---  | 41%  | 41%  | 43%  | 36%  | 30% |
| 39%  | 4NU0 | ---  | ---  | ---  | ---  | ---  | ---  | 39%  | 55%  | 38%  | 29% |
| 47%  | 2RGX | ---  | ---  | ---  | ---  | ---  | ---  | ---  | 43%  | 37%  | 34% |
| 48%  | 3FB4 | ---  | ---  | ---  | ---  | ---  | ---  | ---  | ---  | 39%  | 30% |
| 38%  | 1ZAK | ---  | ---  | ---  | ---  | ---  | ---  | ---  | ---  | ---  | 37% |
| 35%  | 2C95 | ---  | ---  | ---  | ---  | ---  | ---  | ---  | ---  | ---  | --- |

**Figure S8.** Sequence variability for AK orthologs used in RMSD calculations. The organism, PDB code, and residues with defined coordinates are shown for the ten Ap5A-bound AK structures used in calculations. These include AK from bacteria, fungi, plants, and animals. The pairwise sequence identities are shown for all ten AK as well as the sequence identities between *TnAK* and each ortholog having a crystal structure. This analysis yielded four pairs of sequences with identities between 70-79% (yellow), two pairs of sequences with identities between 60-69% (green), five pairs of sequences with identities between 50-59% (orange), seventeen pairs of sequences with identities between 40-49% (gray), sixteen pairs of sequences with identities between 30-39% (magenta), and one sequence pair with identity below 30% (blue).

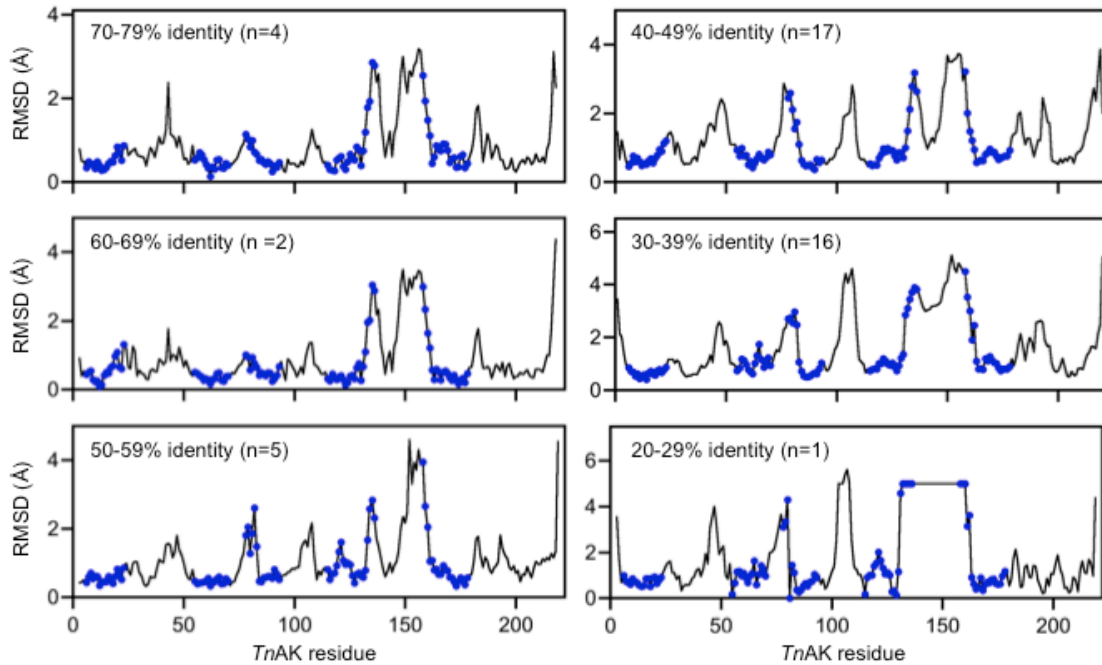

**Figure S9.** Positional RMSD calculated using AK structures of varying identity. The positional RMSD is shown for AK ortholog pairs having sequences with 70-79%, 60-69%, 50-59%, 40-49%, 30-39%, and 20-29% identity. The *TnAK* residues that correspond to peptides I-V, which lacked backbone fission sites in laboratory evolution experiments, are mapped in blue on each profile.

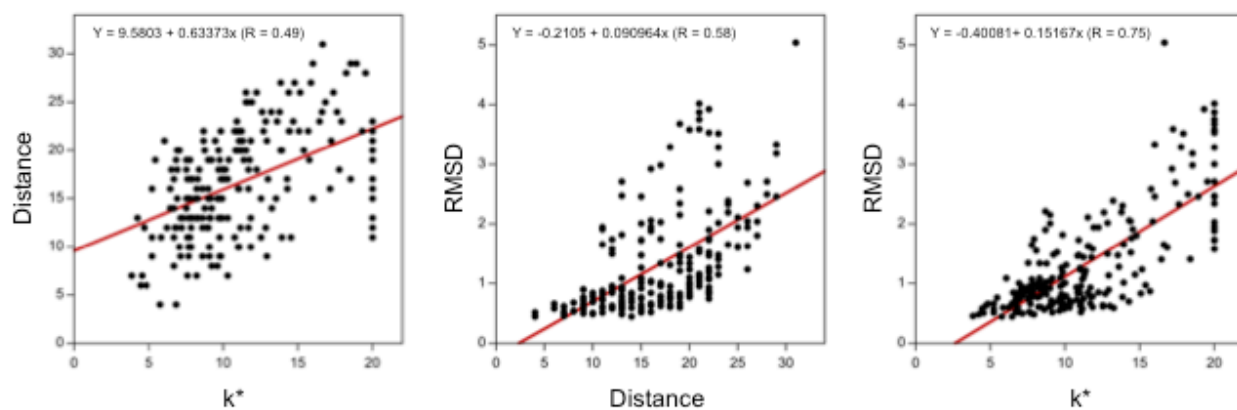

**Figure S10.** Comparison of distance,  $k^*$ , and RMSD for each possible variant. For each possible *TnAK* in our library, we compared the pairwise relationships between each structure-based metric. As expected,  $k^*$  and RMSD displayed the strongest correlation, while distance and  $k^*$  showed the weakest correlation.

**Supplementary Sequences.** Sequences of permuted *TnAK* encoded by the open reading frames in permuteposon vectors selected from the P1, P2, and P3 libraries, as well as permuted *TnAK* encoded by rationally designed pET vectors. Variants are named by the *TnAK* residue that is translated first. Peptides amended to the N-terminus are colored red. Blue residues are duplicated by the transposase reaction. One extra residue is added to the C-terminus in P1 variants (green), while P2 and P3 variants lack an extra residue at their C-terminus. The peptide linker AAA connecting the original termini is shown in bold.

#### **P1 LIBRARY**

>P1 #2, Residues 2-220/1-2

**MGFRIYRETL****SRFS****CAAQ****M**AYLVFLGPPGAGKGTYAKRIQEK**T**GIPHISTGDIFRDIVK**K**ENDELGKK**I**KEIMEK**G**ELVLPDELVNEVVKRRLSEKDCEKGFILDGYPR**T**V**A**Q**A**EFLDSFLESQ**N**Q**L**TA**A**VLFDVPEDVVVQ**R**LT**S**RRIC**P**CKGRIY**N**MISLPPKEDEL**C**DDCKV**K**LVQ**R**DD**D**KEETV**R**HRYKVY**L**E**K**T**Q**PVIDY**G**KK**G**ILK**R**VDGTIGIDNV**V**AEVL**K**IIGWSD**K****AAAM****M**A

>P1 #5, Residues 5-220/1-5

**MGFRIYRETL****SRFS****CAAQ****L**VFLGPPGAGKGTYAKRIQEK**T**GIPHISTGDIFRDIVK**K**ENDELGKK**I**KEIMEK**G**ELVLPDELVNEVVKRRLSEKDCEKGFILDGYPR**T**V**A**Q**A**EFLDSFLESQ**N**Q**L**TA**A**VLFDVPEDVVVQ**R**LT**S**RRIC**P**CKGRIY**N**MISLPPKEDEL**C**DDCKV**K**LVQ**R**DD**D**KEETV**R**HRYKVY**L**E**K**T**Q**PVIDY**G**KK**G**ILK**R**VDGTIGIDNV**V**AEVL**K**IIGWSD**K****AAAM****M**AY**L****V**

>P1 #26, Residues 26-220/1-26

**MGFRIYRETL****SRFS****CAAQ****T**GIPHISTGDIFRDIVK**K**ENDELGKK**I**KEIMEK**G**ELVLPDELVNEVVKRRLSEKDCEKGFILDGYPR**T**V**A**Q**A**EFLDSFLESQ**N**Q**L**TA**A**VLFDVPEDVVVQ**R**LT**S**RRIC**P**CKGRIY**N**MISLPPKEDEL**C**DDCKV**K**LVQ**R**DD**D**KEETV**R**HRYKVY**L**E**K**T**Q**PVIDY**G**KK**G**ILK**R**VDGTIGIDNV**V**AEVL**K**IIGWSD**K****AAAM****M**AYLVFLGPPGAGKGTYAKRIQEK**T****G**

>P1 #29, Residues 29-220/1-29

**MGFRIYRETL****SRFS****CAAQ****P**HISTGDIFRDIVK**K**ENDELGKK**I**KEIMEK**G**ELVLPDELVNEVVKRRLSEKDCEKGFILDGYPR**T**V**A**Q**A**EFLDSFLESQ**N**Q**L**TA**A**VLFDVPEDVVVQ**R**LT**S**RRIC**P**CKGRIY**N**MISLPPKEDEL**C**DDCKV**K**LVQ**R**DD**D**KEETV**R**HRYKVY**L**E**K**T**Q**PVIDY**G**KK**G**ILK**R**VDGTIGIDNV**V**AEVL**K**IIGWSD**K****AAAM****M**AYLVFLGPPGAGKGTYAKRIQEK**T****G****I****P****H**

>P1 #41, Residues 41-220/1-41 (also found in P2 and P3 libraries)

**MGFRIYRETL****SRFS****CAAQ****V**KKENDELGKK**I**KEIMEK**G**ELVLPDELVNEVVKRRLSEKDCEKGFILDGYPR**T**V**A**Q**A**EFLDSFLESQ**N**Q**L**TA**A**VLFDVPEDVVVQ**R**LT**S**RRIC**P**CKGRIY**N**MISLPPKEDEL**C**DDCKV**K**LVQ**R**DD**D**KEETV**R**HRYKVY**L**E**K**T**Q**PVIDY**G**KK**G**ILK**R**VDGTIGIDNV**V**AEVL**K**IIGWSD**K****AAAM****M**AYLVFLGPPGAGKGTYAKRIQEK**T****G****I****P****H**ISTGDIFRDIV**N**

>P1 #53, Residues 53-220/1-53

**MGFRIYRETL****SRFS****CAAQ****K**EIMEK**G**ELVLPDELVNEVVKRRLSEKDCEKGFILDGYPR**T**V**A**Q**A**EFLDSFLESQ**N**Q**L**TA**A**VLFDVPEDVVVQ**R**LT**S**RRIC**P**CKGRIY**N**MISLPPKEDEL**C**DDCKV**K**LVQ**R**DD**D**KEETV**R**HRYKVY**L**E**K**T**Q**PVIDY**G**KK**G**ILK**R**VDGTIGIDNV**V**AEVL**K**IIGWSD**K****AAAM****M**AYLVFLPPGAGKGTYAKRIQEK**T****G****I****P****H**ISTGDIFRDIVK**K**ENDELGKK**I****K****D**

>P1 #54, Residues 54-220/1-54 (also found in P2 library)

**MGFRIYRETL****SRFS****CAAQ****E**IMEK**G**ELVLPDELVNEVVKRRLSEKDCEKGFILDGYPR**T**V**A**Q**A**EFLDSFLESQ**N**Q**L**TA**A**VLFDVPEDVVVQ**R**LT**S**RRIC**P**CKGRIY**N**MISLPPKEDEL**C**DDCKV**K**LVQ**R**DD**D**KEETV**R**HRYKVY**L**E**K**T**Q**PVIDY**G**KK**G**ILK**R**VDGTIGIDNV**V**AEVL**K**IIGWSD**K****AAAM****M**AYLVFLGPPGAGKGTYAKRIQEK**T****G****I****P****H**ISTGDIFRDIVK**K**ENDELGKK**I****K****E****I**

>P1 #94, Residues 94-220/1-94

MGFRIYRETL~~SRFS~~CAAQ~~LA~~AEFLDSFLESQNKQLTAAVLF~~FDV~~PE~~DD~~VVVQRLTSRRICPKCGRINMISLPPKEDELCD  
DDCKVKLVQRDDDDKEETV~~RR~~HRYKVYLEKTQPVIDYYGKKGILKRVDGTIGIDNVVAEVLKIIIGWSDK~~AA~~AMMAYLVFL  
GPPGAGKGT~~YAKRIQ~~EKTGIPHISTGDI~~FR~~DIVK~~KENDEL~~GKKIKEIMEKGELVPDELVNEVVKRRLSEKDCEKGFIL  
LDGYPRTVA~~HA~~

>P1 #99, Residues 99-220/1-99

MGFRIYRETL~~SRFS~~CAAQ~~LD~~SFLESQNKQLTAAVLF~~FDV~~PE~~DD~~VVVQRLTSRRICPKCGRIYNMISLPPKEDELCD  
DDCKVKLVQRDDDDKEETV~~RR~~HRYKVYLEKTQPVIDYYGKKGILKRVDGTIGIDNVVAEVLKIIIGWSDK~~AA~~AMMAYLVFL  
GPPGAGKGT~~YAKRIQ~~EKTGIPHISTGDI~~FR~~DIVK~~KENDEL~~GKKIKEIMEKGELVPDELVNEVVKRRLSEKDCEKGFIL  
DGYPR~~VAQA~~EFLD

>P1 #103, Residues 103-220/1-103 (also found in P2 library)

MGFRIYRETL~~SRFS~~CAAQ~~LES~~QNKQLTAAVLF~~FDV~~PE~~DD~~VVVQRLTSRRICPKCGRIYNMISLPPKEDELCD  
DDCKVKLVQRDDDDKEETV~~RR~~HRYKVYLEKTQPVIDYYGKKGILKRVDGTIGIDNVVAEVLKIIIGWSDK~~AA~~AMMAYLVFL  
GPPGAGKGT~~YAKRIQ~~EKTGIPHISTGDI~~FR~~DIVK~~KENDEL~~GKKIKEIMEKGELVPDELVNEVVKRRLSEKDCEKGFIL  
DGYPR~~VAQA~~EFLDSFLD

>P1 #113, Residues 113-220/1-113

MGFRIYRETL~~SRFS~~CAAQ~~AVL~~FDVPE~~DD~~VVVQRLTSRRICPKCGRIYNMISLPPKEDELCD  
DDCKVKLVQRDDDDKEETV~~RR~~HRYKVYLEKTQPVIDYYGKKGILKRVDGTIGIDNVVAEVLKIIIGWSDK~~AA~~AMMAYLVFL  
GPPGAGKGT~~YAKRIQ~~EKTGIPHISTGDI~~FR~~DIVK~~KENDEL~~GKKIKEIMEKGELVPDELVNEVVKRRLSEKDCEKGFIL  
DGYPR~~VAQA~~EFLDSFLESQNKQLTAAV

>P1 #142, Residues 142-220/1-142 (also found in P2 library)

MGFRIYRETL~~SRFS~~CAAQ~~MIS~~LPPKEDELCD  
DDCKVKLVQRDDDDKEETV~~RR~~HRYKVYLEKTQPVIDYYGKKGILKRVDGTIGIDNVVAEVLKIIIGWSDK~~AA~~AMMAYLVFL  
GPPGAGKGT~~YAKRIQ~~EKTGIPHISTGDI~~FR~~DIVK~~KENDEL~~GKKIKEIMEKGELVPDELVNEVVKRRLSEKDCEKGFIL  
DGYPR~~VAQA~~EFLDSFLESQNKQLTAAVLF~~FDV~~PE~~DD~~VVVQRLTSRRICPKCGRIYNMI

>P1 #144, Residues 144-220/1-144

MGFRIYRETL~~SRFS~~CAAQ~~SL~~LPPKEDELCD  
DDCKVKLVQRDDDDKEETV~~RR~~HRYKVYLEKTQPVIDYGGKILKRVDGTIGIDNVVAEVLKIIIGWSDK~~AA~~AMMAYLVFL  
GPPGAGKGT~~YAKRIQ~~EKTGIPHISTGDI~~FR~~DIVK~~KENDEL~~GKKIKEIMEKGELVPDELVNEVVKRRLSEKDCEKGFIL  
DGYPR~~VAQA~~EFLSFLDSFLESQNKQLTAAVLF~~FDV~~PE~~DD~~VVVQRLTSRRICPKCGRIYNMISL

>P1 #179, Residues 179-220/1-179

MGFRIYRETL~~SRFS~~CAAQ~~LE~~KTQPVIDYYGKKGILKRVDGTIGIDNVVAEVLKIIIGWSDK~~AA~~AMMAYLVFL  
GPPGAGKGT~~YAKRIQ~~EKTGIPHISTGDI~~FR~~DIVK~~KENDEL~~GKKIKEIMEKGELVPDELVNEVVKRRLSEKDCEKGFIL  
DGYPR~~VAQA~~EFLDSFLESQNKQLTAAVLF~~FDV~~PE~~DD~~VVVQRLTSRRICPKCGRIYNMISLPPKEDELCD  
DDCKVKLVQRDDDDKEETV~~RR~~HRYKVYLE

>P1 #184, Residues 184-220/1-184

MGFRIYRETL~~SRFS~~CAAQ~~PV~~VIDYYGKKGILKRVDGTIGIDNVVAEVLKIIIGWSDK~~AA~~AMMAYLVFL  
GPPGAGKGT~~YAKRIQ~~EKTGIPHISTGDI~~FR~~DIVK~~KENDEL~~GKKIKEIMEKGELVPDELVNEVVKRRLSEKDCEKGFIL  
DGYPR~~VAQA~~EFLDSFLESQNKQLTAAVLF~~FDV~~PE~~DD~~VVVQRLTSRRICPKCGRIYNMISLPPKEDELCD  
DDCKVKLVQRDDDDKEETV~~RR~~HRYKVYLEKTQP

>P1 #195, Residues 195-220/1-195

MGFRIYRETL~~SRFS~~CAAQ~~LK~~RV~~DD~~GTIGIDNVVAEVLKIIIGWSDK~~AA~~AMMAYLVFL  
GPPGAGKGT~~YAKRIQ~~EKTGIPHISTGDI~~FR~~DIVK~~KENDEL~~GKKIKEIMEKGELVPDELVNEVVKRRLSEKDCEKGFIL  
DGYPR~~VAQA~~EFLDSFLESQNKQLTAAVLF~~FDV~~PE~~DD~~VVVQRLTSRRICPKCGRIYNMISLPPKEDELCD  
DDCKVKLVQRDDDDKEETV~~RR~~HRYKVYLEKTQP  
VIDYYGKKGILN

>P1 #201, Residues 201-220/1-201

MGFRIYRETLSRFSCAAQTIGIDNVVAEVLKIIIGWSDKAAAMMAYLVFLGPPGAGKGTYAKRIQEKTGIPHISTGDI  
FRDIVKKENDELGKKIKEIMEKGELVPDELVNEVVKRRLSEKDCEKGFILDGYPRVVAQAEFLDSFLESQNKQLTAA  
VLFVDPEDVVVQRLTSRRICPKCGRIYNMISLPPKEDELCDCKVKLVQRDDDKKEETVRHRYKVYLEKTQPVIDYYG  
KKGILKRVDTI

>P1 #207, Residues 207-220/1-207

MGFRIYRETLSRFSCAAQVVAEVLKIIIGWSDKAAAMMAYLVFLGPPGAGKGTYAKRIQEKTGIPHISTGDI  
FRDIVK  
KENDELGKKIKEIMEKGELVPDELVNEVVKRRLSEKDCEKGFILDGYPRVVAQAEFLDSFLESQNKQLTAAVLFVDP  
EDVVVQRLTSRRICPKCGRIYNMISLPPKEDELCDCKVKLVQRDDDKKEETVRHRYKVYLEKTQPVIDYYGKKGILK  
RVDGTIGIDNVV

>P1 #209, Residues 209-220/1-209

MGFRIYRETLSRFSCAAQVAEVLKIIIGWSDKAAAMMAYLVFLGPPGAGKGTYAKRIQEKTGIPHISTGDI  
FRDIVKKE  
NDELGKKIKEIMEKGELVPDELVNEVVKRRLSEKDCEKGFILDGYPRVVAQAEFLDSFLESQNKQLTAAVLFVDPED  
VVVQRLTSRRICPKCGRIYNMISLPPKEDELCDCKVKLVQRDDDKKEETVRHRYKVYLEKTQPVIDYYGKKGILKRV  
DGTIGIDNVVAD

>P1 #212, Residues 212-220/1-212

MGFRIYRETLSRFSCAAQLKIIIGWSDKAAAMMAYLVFLGPPGAGKGTYAKRIQEKTGIPHISTGDI  
FRDIVK  
KENDELGKKIKEIMEKGELVPDELVNEVVKRRLSEKDCEKGFILDGYPRVVAQAEFLDSFLESQNKQLTAAVLFVDPEDVVV  
QRLTSRRICPKCGRIYNMISLPPKEDELCDCKVKLVQRDDDKKEETVRHRYKVYLEKTQPVIDYYGKKGILKRVDTI  
GIDNVVAEVLN

>P1 #217, Residues 217-220/1-217

MGFRIYRETLSRFSCAAQWSDKAAAMMAYLVFLGPPGAGKGTYAKRIQEKTGIPHISTGDI  
FRDIVK  
KENDELGKKI  
KEIMEKGELVPDELVNEVVKRRLSEKDCEKGFILDGYPRVVAQAEFLDSFLESQNKQLTAAVLFVDPEDVVVQRLTS  
RRICPKCGRIYNMISLPPKEDELCDCKVKLVQRDDDKKEETVRHRYKVYLEKTQPVIDYYGKKGILKRVDTIGIDN  
VVAEVLKIIIGWS

## P2 LIBRARY

>P2 #38, Residues 38-220/1-38 (also found P3 library)

MIRDIVKKENDELGKKIKEIMEKGELVPDELVNEVVKRRLSEKDCEKGFILDGYPRVVAQAEFLDSFLESQNKQLTA  
AVLFVDPEDVVVQRLTSRRICPKCGRIYNMISLPPKEDELCDCKVKLVQRDDDKKEETVRHRYKVYLEKTQPVIDYY  
GKKGILKRVDTIGIDNVVAEVLKIIIGWSDKAAAMMAYLVFLGPPGAGKGTYAKRIQEKTGIPHISTGDI  
FR

>P2 #39, Residues 39-220/1-39 (also found P3 library)

MRDIVKKENDELGKKIKEIMEKGELVPDELVNEVVKRRLSEKDCEKGFILDGYPRVVAQAEFLDSFLESQNKQLTAA  
VLFVDPEDVVVQRLTSRRICPKCGRIYNMISLPPKEDELCDCKVKLVQRDDDKKEETVRHRYKVYLEKTQPVIDYYG  
KKGILKRVDTIGIDNVVAEVLKIIIGWSDKAAAMMAYLVFLGPPGAGKGTYAKRIQKTGIPHISTGDI  
FRD

>P2 #41, Residues 41-220/1-41 (also found in P1 and P3 libraries)

MIVKKENDELGKKIKEIMEKGELVPDELVNEVVKRRLSEKDCEKGFILDGYPRVVAQAEFLDSFLESQNKQLTAAV  
LFDVDPEDVVVQRLTSRRICPKCGRIYNMISLPPKEDELCDCKVKLVQRDDDKKEETVRHRYKVYLEKTQPVIDYYGK  
GILKRVDTIGIDNVVAEVLKIIIGWSDKAAAMMAYLVFLGPPGAGKGTYAKRIQEKTGIPHISTGDI  
FRDIV

>P2 #44, Residues 44-220/1-44 (also found P3 library)

MKENDELGKKIKEIMEKGELVPDELVNEVVKRRLSEKDCEKGFILDGYPRVVAQAEFLDSFLESQNKQLTAAVLFV  
DPEDVVVQRLTSRRICPKCGRIYNMISLPPKEDELCDCKVKLVQRDDDKKEETVRHRYKVYLEKTQPVIDYYGKKGIL  
KRVDTIGIDNVVAEVLKIIIGWSDKAAAMMAYLVFLGPPGAGKGTYAKRIQEKTGIPHISTGDI  
FRDIVKKE

>P2 #54, Residues 54-220/1-54 (also found P1 library)

MKEIMEKGELVPDELVNEVVKRRLSEKDCEKGFILDGYPRVVAQAEFLDSFLESQNKQLTAAVLFVDPEDVVVQRLT  
SRRICPKCGRIYNMISLPPKEDELCDCKVKLVQRDDDKKEETVRHRYKVYLEKTQPVIDYYGKKGILKRVDTIGID  
NVVAEVLKIIIGWSDKAAAMMAYLVFLGPPGAGKGTYAKRIQEKTGIPHISTGDI  
FRDIVK  
KENDELGKKIKE

>P2 #71, Residues 71-220/1-71

**MIV**KRRRLSEKDCEKGFILDGYPRVVAQAEFLDSFLESQNKQLTAAVLFDPEDVVVQRLTSRRICPKCGRIYNMISLPPKEDELCDCKVKLVQRDDDKEETVRHRYKVYLEKTQPVIDYYGKKGILKRVDTIGIDNVVAEVLKIIIGWSDK**AA**AMMAYLVFLGPPGAGKGTYAKRIQEKTGIPHISTGDIRDIVKKENDELGKKIKEIMEKGELVPDELVNEV**V**

>P2 #77, Residues 77-220/1-77 (also found P3 library)

**MTE**KDCEKGFILDGYPRVVAQAEFLDSFLESQNKQLTAAVLFDPEDVVVQRLTSRRICPKCGRIYNMISLPPKEDELCDCKVKLVQRDDDKEETVRHRYKVYLEKTQPVIDYYGKKGILKRVDTIGIDNVVAEVLKIIIGWSDK**AA**AMMAYLVFLGPPGAGKGTYAKRIQEKTGIPHISTGDIRDIVKKENDELGKKIKEIMEKGELVPDELVNEV**VKRR**LSE

>P2 #101, Residues 101-220/1-101

**MNS**FLESQNKQLTAAVLFDPEDVVVQRLTSRRICPKCGRIYNMISLPPKEDELCDCKVKLVQRDDDKEETVRHRYKVYLEKTQPVIDYYGKKGILKRVDTIGIDNVVAEVLKIIIGWSDK**AA**AMMAYLVFLGPPGAGKGTYAKRIQEKTGIPHISTGDIRDIVKKENDELGKKIKEIMEKGELVPDELVNEV**VKRR**LSEKDCEKGFILDGYPRVVAQAEFLDS**S**

>P2 #103, Residues 103-220/1-103 (also found P1 library)

**MIL**ESQNKQLTAAVLFDPEDVVVQRLTSRRICPKCGRIYNMISLPPKEDELCDCKVKLVQRDDDKEETVRHRYKVYLEKTQPVIDYYGKKGILKRVDTIGIDNVVAEVLKIIIGWSDK**AA**AMMAYLVFLGPPGAGKGTYAKRIQEKTGIPHISTGDIRDIVKKENDELGKKIKEIMEKGELVPDELVNEV**VKRR**LSEKDCEKGFILDGYPRVVAQAEFLDS**FL**

>P2 #104, Residues 104-220/1-104

**MM**ESQNKQLTAAVLFDPEDVVVQRLTSRRICPKCGRIYNMISLPPKEDELCDCKVKLVQRDDDKEETVRHRYKVYLEKTQPVIDYYGKKGILKRVDTIGIDNVVAEVLKIIIGWSDK**AA**AMMAYLVFLGPPGAGKGTYAKRIQEKTGIPHISTGDIRDIVKKENDELGKKIKEIMEKGELVPDELVNEV**VKRR**LSEKDCEKGFILDGYPRVVAQAEFLDS**FL**

>P2 #111, Residues 111-220/1-111 (also found P3 library)

**MIT**AAVLFDPEDVVVQRLTSRRICPKCGRIYNMISLPPKEDELCDCKVKLVQRDDDKEETVRHRYKVYLEKTQPVIDYYGKKGILKRVDTIGIDNVVAEVLKIIIGWSDK**AA**AMMAYLVFLGPPGAGKGTYAKRIQEKTGIPHISTGDIRDIVKKENDELGKKIKEIMEKGELVPDEEV**VKRR**LSEKDCEKGFILDGYPRVVAQAEFLDSFLESQNKQL**T**

>P2 #137, Residues 137-220/1-137 (also found P3 library)

**MS**GRIYNMISLPPKEDELCDCKVKLVQRDDDKEETVRHRYKVYLEKTQPVIDYYGKKGILKRVDTIGIDNVVAEVLKIIIGWSDK**AA**AMMAYLVFLGPPGAGKGTYAKRIQEKTGIPHISTGDIRDIVKKENDELGKKIKEIMEKGELVPDELVNEV**VKRR**LSEKDCEKGFILDGYPRVVAQAEFLDSFLESQNKQLTAAVLFDPEDVVVQRLTSRRICPKCG**R**

>P2 #138, Residues 138-220/1-138

**MS**RIYNMISLPPKEDELCDCKVKLVQRDDDKEETVRHRYKVYLEKTQPVIDYYGKKGILKRVDTIGIDNVVAEVLKIIIGWSDK**AA**AMMAYLVFLGPPGAGKGTYAKRIQEKTGIPHISTGDIRDIVKKENDELGKKIKEIMEKGELVPDELVNEV**VKRR**LSEKDCEKGFILDGYPRVVAQAEFLDSFLESQNKQLTAAVLFDPEDVVVQRLTSRRICPKCG**R**

>P2 #141, Residues 141-220/1-141

**MNN**MISLPPKEDELCDCKVKLVQRDDDKEETVRHRYKVYLEKTQPVIDYYGKKGILKRVDTIGIDNVVAEVLKIIIGWSDK**AA**AMMAYLVFLGPPGAGKGTYAKRIQEKTGIPHISTGDIRDIVKKENDELGKKIKEIMEKGELVPDELVNEV**VKRR**LSEKDCEKGFILDGYPRVVAQAEFLDSFLESQNKQLTAAVLFDPEDVVVQRLTSRRICPKCGRIY**N**

>P2 #142, Residues 142-220/1-142 (also found P1 library)

**MNM**MISLPPKEDELCDCKVKLVQRDDDKEETVRHRYKVYLEKTQPVIDYYGKKGILKRVDTIGIDNVVAEVLKIIIGWSDK**AA**AMMAYLVFLGPPGAGKGTYAKRIQEKTGIPHISTGDIRDIVKKENDELGKKIKEIMEKGELVPDELVNEV**VKRR**LSEKDCEKGFILDGYPRVVAQAEFLDSFLESQNKQLTAAVLFDPEDVVVQRLTSRRICPKCGRIY**N**

>P2 #156, Residues 156-220/1-156 (also found P3 library)

**MNC**KVKLVQRDDDKEETVRHRYKVYLEKTQPVIDYYGKKGILKRVDTIGIDNVVAEVLKIIIGWSDK**AA**AMMAYLVFLGPPGAGKGTYAKRIQEKTGIPHISTGDIRDIVKKENDELGKKIKEIMEKGELVPDELVNEV**VKRR**LSEKDCEKGFILDGYPRVVAQAEFLDSFLESQNKQLTAAVLFDPEDVVVQRLTSRRICPKCGRIYNMISLPPKEDELCD**CC**

>P2 #157, Residues 157-220/1-157 (also found P3 library)  
MSKVKLVRDDDDKEETVRHRYKVYLEKTQPVIDYYGKKGILKRVDTIGIDNVVAEVLKIIIGWSDKAAAMMAYLVFLGPPGAGKGTYAKRIQEKTGIPHISTGDIFRDIVKKNENDELGKKIKEIMEKGELVPDELVNEVVKRRLSEKDCEKGFILDGYPRTVAQAEFLDSFLESQNKQLTAAVLFDPEDVVVQRLTSRRICPKCGRIYNMISLPPKEDELCDCK

>P2 #188, Residues 188-220/1-188  
MNYGKKGILKRVDTIGIDNVVAEVLKIIIGWSDKAAAMMAYLVFLGPPGAGKGTYAKRIQEKTGIPHISTGDIFRDIVKKNENDELGKKIKEIMEKGELVPDELVNEVVKRRLSEKDCEKGFILDGYPRTVAQAEFLDSFLESQNKQLTAAVLFDPEDVVVQRLTSRRICPKCGRIYNMISLPPKEDELCDCKVKLVQRDDDDKEETVRHRYKVYLEKTQPVIDY

>P2 #189, Residues 189-220/1-189  
MNYGKKGILKRVDTIGIDNVVAEVLKIIIGWSDKAAAMMAYLVFLGPPGAGKGTYAKRIQEKTGIPHISTGDIFRDIVKKNENDELGKKIKEIMEKGELVPDELVNEVVKRRLSEKDCEKGFILDGYPRTVAQAEFLDSFLESQNKQLTAAVLFDPEDVVVQRLTSRRICPKCGRIYNMISLPPKEDELCDCKVKLVQRDDDDKEETVRHRYKVYLEKTQPVIDY

>P2 #190, Residues 190-220/1-190 (also found P3 library)  
MNGKKGILKRVDTIGIDNVVAEVLKIIIGWSDKAAAMMAYLVFLGPPGAGKGTYAKRIQEKTGIPHISTGDIFRDIVKKNENDELGKKIKEIMEKGELVPDELVNEVVKRRLSEKDCEKGFILDGYPRTVAQAEFLDSFLESQNKQLTAAVLFDPEDVVVQRLTSRRICPKCGRIYNMISLPPKEDELCDCKVKLVQRDDDDKEETVRHRYKVYLEKTQPVIDYYG

>P2 #199, Residues 199-220/1-199  
MMDGTIGIDNVVAEVLKIIIGWSDKAAAMMAYLVFLGPPGAGKGTYAKRIQEKTGIPHISTGDIFRDIVKKNENDELGKKIKEIMEKGELVPDELVNEVVKRRLSEKDCEKGFILDGYPRTVAQAEFLDSFLESQNKQLTAAVLFDPEDVVVQRLTSRRICPKCGRIYNMISLPPKEDELCDCKVKLVQRDDDDKEETVRHRYKVYLEKTQPVIDYYGKKGILKRV

>P2 #206, Residues 206-220/1-206  
MNNVVAEVLKIIIGWSDKAAAMMAYLVFLGPPGAGKGTYAKRIQEKTGIPHISTGDIFRDIVKKNENDELGKKIKEIMEKGELVPDELVNEVVKRRLSEKDCEKGFILDGYPRTVAQAEFLDSFLESQNKQLTAAVLFDPEDVVVQRLTSRRICPKCGRIYNMISLPPKEDELCDCKVKLVQRDDDDKEETVRHRYKVYLEKTQPVIDYYGKKGILKRVDTIGIDN

>P2 #213, Residues 213-220/1-213 (also found P3 library)  
MIKIIIGWSDKAAAMMAYLVFLGPPGAGKGTYAKRIQEKTGIPHISTGDIFRDIVKKNENDELGKKIKEIMEKGELVPDELVNEVVKRRLSEKDCEKGFILDGYPRTVAQAEFLDSFLESQNKQLTAAVLFDPEDVVVQRLTSRRICPKCGRIYNMISLPPKEDELCDCKVKLVQRDDDDKEETVRHRYKVYLEKTQPVIDYYGKKGILKRVDTIGIDNVVAEVLK

>P2 #216, Residues 216-220/1-216  
MIGWSDKAAAMMAYLVFLGPPGAGKGTYAKRIQEKTGIPHISTGDIFRDIVKKNENDELGKKIKEIMEKGELVPDELVNEVVKRRLSEKDCEKGFILDGYPRTVAQAEFLDSFLESQNKQLTAAVLFDPEDVVVQRLTSRRICPKCGRIYNMISLPPKEDELCDCKVKLVQRDDDDKEETVRHRYKVYLEKTQPVIDYYGKKGILKRVDTIGIDNVVAEVLKII

### **P3 LIBRARY**

>P3 #24, Residues 24-220/1-24  
MKEKTGIPHISTGDIFRDIVKKNENDELGKKIKEIMEKGELVPDELVNEVVKRRLSEKDCEKGFILDGYPRTVAQAEFLDSFLESQNKQLTAAVLFDPEDVVVQRLTSRRICPKCGRIYNMISLPPKEDELCDCKVKLVQRDDDDKEETVRHRYKVYLEKTQPVIDYYGKKGILKRVDTIGIDNVVAEVLKIIIGWSDKAAAMMAYLVFLGPPGAGKGTYAKRIQ

>P3 #38, Residues 38-220/1-38 (also found in P2 library)  
MIRDIVKKNENDELGKKIKEIMEKGELVPDELVNEVVKRRLSEKDCEKGFILDGYPRTVAQAEFLDSFLESQNKQLTAAVLFDPEDVVVQRLTSRRICPKCGRIYNMISLPPKEDELCDCKVKLVQRDDDDKEETVRHRYKVYLEKTQPVIDYYGKKGILKRVDTIGIDNVVAEVLKIIIGWSDKAAAMMAYLVFLGPPGAGKGTYAKRIQEKTGIPHISTGDIFR

>P3 #39, Residues 39-220/1-39 (also found in P2 library)  
MRDIVKKNENDELGKKIKEIMEKGELVPDELVNEVVKRRLSEKDCEKGFILDGYPRTVAQAEFLDSFLESQNKQLTAAVLFDPEDVVVQRLTSRRICPKCGRIYNMISLPPKEDELCDCKVKLVQRDDDDKEETVRHRYKVYLEKTQPVIDYYGKKGILKRVDTIGIDNVVAEVLKIIIGWSDKAAAMMAYLVFLGPPGAGKGTYAKRIQEKTGIPHISTGDIFR



>P3 #41, Residues 41-220/1-41 (also found in P1 and P2 libraries)  
MIVKKENDELGKKIKEIMEKGELVPDELVNEVVKRRLSEKDCEKGFILDGYPRVAQAEFLDSFLESQNKQLTAAVL  
FDVPEDVVVQRLTSRRICPKCGRIYNMISLPPKEDELCDCKVKLVQRDDDKEETVRHRYKVYLEKTQPVIDYYGKK  
GILKRVDTIGIDNVVAEVLKIIIGWSDKAAAMMAYLVFLGPPGAGKGTYAKRIQEKTGIPHISTGDIFRDIV

>P3 #42, Residues 42-220/1-42  
MMKKNDELGKKIKEIMEKGELVPDELVNEVVKRRLSEKDCEKGFILDGYPRVAQAEFLDSFLESQNKQLTAAVL  
DVPEDVVVQRLTSRRICPKCGRIYNMISLPPKEDELCDCKVKLVQRDDDKEETVRHRYKVYLEKTQPVIDYYGKK  
ILKRVDTIGIDNVVAEVLKIIIGWSDKAAAMMAYLVFLGPPGAGKGTYAKRIQEKTGIPHISTGDIFRDIVK

>P3 #44, Residues 44-220/1-44 (also found in P2 library)  
MKENDELGKKIKEIMEKGELVPDELVNEVVKRRLSEKDCEKGFILDGYPRVAQAEFLDSFLESQNKQLTAAVLFDV  
PEDVVVQRLTSRRICPKCGRIYNMISLPPKEDELCDCKVKLVQRDDDKEETVRHRYKVYLEKTQPVIDYYGKKGIL  
KRVDTIGIDNVVAEVLKIIIGWSDKAAAMMAYLVFLGPPGAGKGTYAKRIQEKTGIPHISTGDIFRDIVKKE

>P3 #46, Residues 46-220/1-46  
MNDDELGKKIKEIMEKGELVPDELVNEVVKRRLSEKDCEKGFILDGYPRVAQAEFLDSFLESQNKQLTAAVLFDVPE  
DVVVQRLTSRRICPKCGRIYNMISLPPKEDELCDCKVKLVQRDDDKEETVRHRYKVYLEKTQPVIDYYGKKGILK  
VDGTIGIDNVVAEVLKIIIGWSDKAAAMMAYLVFLGPPGAGKGTYAKRIQEKTGIPHISTGDIFRDIVKKN

>P3 #47, Residues 47-220/1-47  
MNELGKKIKEIMEKGELVPDELVNEVVKRRLSEKDCEKGFILDGYPRVAQAEFLDSFLESQNKQLTAAVLFDVPE  
VVVQRLTSRRICPKCGRIYNMISLPPKEDELCDCKVKLVQRDDDKEETVRHRYKVYLEKTQPVIDYYGKKGILK  
DGTIGIDNVVAEVLKIIIGWSDKAAAMMAYLVFLGPPGAGKGTYAKRIQEKTGIPHISTGDIFRDIVKKN

>P3 #49, Residues 49-220/1-49  
MIGKKIKEIMEKGELVPDELVNEVVKRRLSEKDCEKGFILDGYPRVAQAEFLDSFLESQNKQLTAAVLFDVPE  
VQRLTSRRICPKCGRIYNMISLPPKEDELCDCKVKLVQRDDDKEETVRHRYKVYLEKTQPVIDYYGKKGILK  
TIGIDNVVAEVLKIIIGWSDKAAAMMAYLVFLGPPGAGKGTYAKRIQEKTGIPHISTGDIFRDIVKKN

>P3 #74, Residues 74-220/1-74  
MRRLSEKDCEKGFILDGYPRVAQAEFLDSFLESQNKQLTAAVLFDVPEDVVVQRLTSRRICPKCGRIYNMISLPP  
EDELCDCKVKLVQRDDDKEETVRHRYKVYLEKTQPVIDYYGKKGILKRVDTIGIDNVVAEVLKIIIGWSDKAAAM  
AYLVFLGPPGAGKGTYAKRIQEKTGIPHISTGDIFRDIVKKNDELGKKIKEIMEKGELVPDELVNEVVKR

>P3 #77, Residues 77-220/1-77 (also found in P2 library)  
MTEKDCEKGFILDGYPRVAQAEFLDSFLESQNKQLTAAVLFDVPEDVVVQRLTSRRICPKCGRIYNMISLPPKE  
LCDCKVKLVQRDDDKEETVRHRYKVYLEKTQPVIDYYGKKGILKRVDTIGIDNVVAEVLKIIIGWSDKAAAMMAY  
LVFLGPPGAGKGTYAKRIQEKTGIPHISTGDIFRDIVKKNDELGKKIKEIMEKGELVPDELVNEVVKRRLSE

>P3 #106, Residues 106-220/1-106  
MTQNKQLTAAVLFDVPEDVVVQRLTSRRICPKCGRIYNMISLPPKEDELCDCKVKLVQRDDDKEETVRHRYKVYLE  
KTQPVIDYYGKKGILKRVDTIGIDNVVAEVLKIIIGWSDKAAAMMAYLVFLGPPGAGKGTYAKRIQEKTGIPHIST  
DIFRDIVKKNDELGKKIKEIMEKGELVPDELVNEVVKRRLSEKDCEKGFILDGYPRVAQAEFLDSFLESQ

>P3 #108, Residues 108-220/1-108  
MNKQLTAAVLFDVPEDVVVQRLTSRRICPKCGRIYNMISLPPKEDELCDCKVKLVQRDDDKEETVRHRYKVYLEKT  
QPVIDYYGKKGILKRVDTIGIDNVVAEVLKIIIGWSDKAAAMMAYLVFLGPPGAGKGTYAKRIQEKTGIPHISTG  
IFRDIVKKNDELGKKIKEIMEKGELVPDELVNEVVKRRLSEKDCEKGFILDGYPRVAQAEFLDSFLESQNK

>P3 #109, Residues 109-220/1-109  
MKQLTAAVLFDVPEDVVVQRLTSRRICPKCGRIYNMISLPPKEDELCDCKVKLVQRDDDKEETVRHRYKVYLEKT  
PVIDYYGKKGILKRVDTIGIDNVVAEVLKIIIGWSDKAAAMMAYLVFLGPPGAGKGTYAKRIQEKTGIPHISTG  
RDIVKKNDELGKKIKEIMEKGELVPDELVNEVVKRRLSEKDCEKGFILDGYPRVAQAEFLDSFLESQNKQ

>P3 #111, Residues 111-220/1-111 (also found in P2 library)  
MITAAVLFDPEDVVVQRLTSRRICPKCGRIYNMISLPPKEDELCDCKVKLVQRDDDKEETVRHRYKVYLEKTQPV  
IDYYGKKGILKRVDGTIGIDNVVAEVLKIIIGWSDKAAAMMAYLVFLGPPGAGKGTAKRIQEKTGIPHISTGDIFRD  
IVKKENDELGKKIKEIMEKGELVPDELVNEVVKRRLSEKDCEKGFILDGYPRTVAQAEFLDSFLESQNKQLT

>P3 #114, Residues 114-220/1-114  
MTVLFDPEDVVVQRLTSRRICPKCGRIYNMISLPPKEDELCDCKVKLVQRDDDKEETVRHRYKVYLEKTQPV  
IDYYGKKGILKRVDGTIGIDNVVAEVLKIIIGWSDKAAAMMAYLVFLGPPGAGKGTAKRIQEKTGIPHISTGDIFRD  
IVKKENDELGKKIKEIMEKGELVPDELVNEVVKRRLSEKDCEKGFILDGYPRTVAQAEFLDSFLESQNKQLTAAV

>P3 #137, Residues 137-220/1-137 (also found in P2 library)  
MSGRIYNMISLPPKEDELCDCKVKLVQRDDDKEETVRHRYKVYLEKTQPV  
IDYYGKKGILKRVDGTIGIDNVVAEVLKIIIGWSDKAAAMMAYLVFLGPPGAGKGTAKRIQEKTGIPHISTGDIFRD  
IVKKENDELGKKIKEIMEKGELVPDELVNEVVKRRLSEKDCEKGFILDGYPRTVAQAEFLDSFLESQNKQLTAAVLFDPEDVVVQRLTSRRICPKCG

>P3 #156, Residues 156-220/1-156 (also found in P2 library)  
MNCVKLVQRDDDKEETVRHRYKVYLEKTQPV  
IDYYGKKGILKRVDGTIGIDNVVAEVLKIIIGWSDKAAAMMAYLVFLGPPGAGKGTAKRIQEKTGIPHISTGDIFRD  
IVKKENDELGKKIKEIMEKGELVPDELVNEVVKRRLSEKDCEKGFILDGYPRTVAQAEFLDSFLESQNKQLTAAVLFDPEDVVVQRLTSRRICPKCGRIYNMISLPPKEDELCDCK

>P3 #157, Residues 157-220/1-157 (also found in P2 library)  
MSKVKLVQRDDDKEETVRHRYKVYLEKTQPV  
IDYYGKKGILKRVDGTIGIDNVVAEVLKIIIGWSDKAAAMMAYLVFLGPPGAGKGTAKRIQEKTGIPHISTGDIFRD  
IVKKENDELGKKIKEIMEKGELVPDELVNEVVKRRLSEKDCEKGFILDGYPRTVAQAEFLDSFLESQNKQLTAAVLFDPEDVVVQRLTSRRICPKCGRIYNMISLPPKEDELCDCK

>P3 #190, Residues 190-220/1-190 (also found in P2 library)  
MNGKKGILKRVDGTIGIDNVVAEVLKIIIGWSDKAAAMMAYLVFLGPPGAGKGTAKRIQEKTGIPHISTGDIFRD  
IVKKENDELGKKIKEIMEKGELVPDELVNEVVKRRLSEKDCEKGFILDGYPRTVAQAEFLDSFLESQNKQLTAAVLFDPEDVVVQRLTSRRICPKCGRIYNMISLPPKEDELCDCKVKLVQRDDDKEETVRHRYKVYLEKTQPV  
IDYYG

>P3 #191, Residues 191-220/1-191  
MRKKGILKRVDGTIGIDNVVAEVLKIIIGWSDKAAAMMAYLVFLGPPGAGKGTAKRIQEKTGIPHISTGDIFRD  
IVKKENDELGKKIKEIMEKGELVPDELVNEVVKRRLSEKDCEKGFILDGYPRTVAQAEFLDSFLESQNKQLTAAVLFDPEDVVVQRLTSRRICPKCGRIYNMISLPPKEDELCDCKVKLVQRDDDKEETVRHRYKVYLEKTQPV  
IDYYG

>P3 #192, Residues 192-220/1-192  
MKKGILKRVDGTIGIDNVVAEVLKIIIGWSDKAAAMMAYLVFLGPPGAGKGTAKRIQEKTGIPHISTGDIFRD  
IVKKENDELGKKIKEIMEKGELVPDELVNEVVKRRLSEKDCEKGFILDGYPRTVAQAEFLDSFLESQNKQLTAAVLFDPEDVVVQRLTSRRICPKCGRIYNMISLPPKEDELCDCKVKLVQRDDDKEETVRHRYKVYLEKTQPV  
IDYYG

>P3 #213, Residues 213-220/1-213 (also found in P2 library)  
MIKIIIGWSDKAAAMMAYLVFLGPPGAGKGTAKRIQEKTGIPHISTGDIFRD  
IVKKENDELGKKIKEIMEKGELVPDELVNEVVKRRLSEKDCEKGFILDGYPRTVAQAEFLDSFLESQNKQLTAAVLFDPEDVVVQRLTSRRICPKCGRIYNMISLPPKEDELCDCKVKLVQRDDDKEETVRHRYKVYLEKTQPV  
IDYYGKKGILKRVDGTIGIDNVVAEVLK

### **Rationally designed pET vectors (discovered in a single library)**

>pET #26, Residues 26-220/1-26  
MKTGIPHISTGDIFRDIVKKENDELGKKIKEIMEKGELVPDELVNEVVKRRLSEKDCEKGFILDGYPRTVAQAEFLD  
SFLESQNKQLTAAVLFDPEDVVVQRLTSRRICPKCGRIYNMISLPPKEDELCDCKVKLVQRDDDKEETVRHRYKV  
YLEKTQPV  
IDYYGKKGILKRVDGTIGIDNVVAEVLKIIIGWSDKAAAMMAYLVFLGPPGAGKGTAKRIQEK

>pET #26, Residues 26-220/1-26  
MGFRIYRETLSRFSCAAQTGIPHISTGDIFRDIVKKENDELGKKIKEIMEKGELVPDELVNEVVKRRLSEKDCEKGF  
ILDGYPRTVAQAEFLDSFLESQNKQLTAAVLFDPEDVVVQRLTSRRICPKCGRIYNMISLPPKEDELCDCKVKLV  
QRDDDKEETVRHRYKVYLEKTQPV  
IDYYGKKGILKRVDGTIGIDNVVAEVLKIIIGWSDKAAAMMAYLVFLGPPGAGKGTAKRIQEK

>pET #44, Residues 44-220/1-44

MKENDELGKKIKEIMEKGELVPDELVNEVVKRRLSEKDCEKGFILDGYPRTVAQAEFLDSFLESQNKQLTAAVLFDV  
PEDVVVQRLTSRRICPKCGRIYNMISLPPKEDELCDCKVKLVQRDDDKEETVRHRYKVYLEKTQPVIDYYGKKGIL  
KRVDTIGIDNVVAEVLKIIIGWSDKAAAMMAYLVFLGPPGAGKGTAKRIQEKTGIPHISTGDI FRDIVKKE

>pET #44, Residues 44-220/1-44

MGFRIYRETLSRFSCAAQENDELGKKIKEIMEKGELVPDELVNEVVKRRLSEKDCEKGFILDGYPRTVAQAEFLDSF  
LESQNKQLTAAVLFDVDPEDVVVQRLTSRRICPKCGRIYNMISLPPKEDELCDCKVKLVQRDDDKEETVRHRYKVYL  
EKTQPVIDYYGKKGILKRVDTIGIDNVVAEVLKIIIGWSDKAAAMMAYLVFLGPPGAGKGTAKRIQEKTGIPHIST  
GDIFRDIVKKEN

>pET #53, Residues 53-220/1-53

MIKEIMEKGELVPDELVNEVVKRRLSEKDCEKGFILDGYPRTVAQAEFLDSFLESQNKQLTAAVLFDVDPEDVVVQRL  
TSRRICPKCGRIYNMISLPPKEDELCDCKVKLVQRDDDKEETVRHRYKVYLEKTQPVIDYYGKKGILKRVDTIGI  
DNVVAEVLKIIIGWSDKAAAMMAYLVFLGPPGAGKGTAKRIQEKTGIPHISTGDI FRDIVKKENDELGKKIK

>pET #53, Residues 53-220/1-53

MGFRIYRETLSRFSCAAQKEIMEKGELVPDELVNEVVKRRLSEKDCEKGFILDGYPRTVAQAEFLDSFLESQNKQLT  
AAVLFDVDPEDVVVQRLTSRRICPKCGRIYNMISLPPKEDELCDCKVKLVQRDDDKEETVRHRYKVYLEKTQPVIDY  
YGKKGILKRVDTIGIDNVVAEVLKIIIGWSDKAAAMMAYLVFLGPPGAGKGTAKRIQEKTGIPHISTGDI FRDIVK  
KENDELGKKIKD

>pET #111, Residues 111-220/1-111

MITAAVLFDVDPEDVVVQRLTSRRICPKCGRIYNMISLPPKEDELCDCKVKLVQRDDDKEETVRHRYKVYLEKTQP  
VIDYYGKKGILKRVDTIGIDNVVAEVLKIIIGWSDKAAAMMAYLVFLGPPGAGKGTAKRIQEKTGIPHISTGDI FR  
DIVKKENDELGKKIKEIMEKGELVPDELVNEVVKRRLSEKDCEKGFILDGYPRTVAQAEFLDSFLESQNKQLT

>pET #111, Residues 111-220/1-111

MGFRIYRETLSRFSCAAQTAAVLFDVDPEDVVVQRLTSRRICPKCGRIYNMISLPPKEDELCDCKVKLVQRDDDKEE  
TVRHRYKVYLEKTQPVIDYYGKKGILKRVDTIGIDNVVAEVLKIIIGWSDKAAAMMAYLVFLGPPGAGKGTAKRIQ  
EKTGIPHISTGDI FRDIVKKENDELGKKIKEIMEKGELVPDELVNEVVKRRLSEKDCEKGFILDGYPRTVAQAEFLD  
SFLESQNKQLTS

>pET #137, Residues 137-220/1-137

MSGRIYNMISLPPKEDELCDCKVKLVQRDDDKEETVRHRYKVYLEKTQPVIDYYGKKGILKRVDTIGIDNVVAE  
VLKIIIGWSDKAAAMMAYLVFLGPPGAGKGTAKRIQEKTGIPHISTGDI FRDIVKKENDELGKKIKEIMEKGELVP  
DELVNEVVKRRLSEKDCEKGFILDGYPRTVAQAEFLDSFLESQNKQLTAAVLFDVDPEDVVVQRLTSRRICPKCG

>pET #137, Residues 137-220/1-137

MGFRIYRETLSRFSCAAQGRINMISLPPKEDELCDCKVKLVQRDDDKEETVRHRYKVYLEKTQPVIDYYGKKGIL  
KRVDTIGIDNVVAEVLKIIIGWSDKAAAMMAYLVFLGPPGAGKGTAKRIQEKTGIPHISTGDI FRDIVKKENDELG  
KKIKEIMEKGELVPDELVNEVVKRRLSEKDCEKGFILDGYPRTVAQAEFLDSFLESQNKQLTAAVLFDVDPEDVVVQ  
RLTSRRICPKCGS

>pET #157, Residues 157-220/1-157

MSKVKLVQRDDDKEETVRHRYKVYLEKTQPVIDYYGKKGILKRVDTIGIDNVVAEVLKIIIGWSDKAAAMMAYLVFL  
GPPGAGKGTAKRIQEKTGIPHISTGDI FRDIVKKENDELGKKIKEIMEKGELVPDELVNEVVKRRLSEKDCEKGF  
ILDGYPRTVAQAEFLDSFLESQNKQLTAAVLFDVDPEDVVVQRLTSRRICPKCGRIYNMISLPPKEDELCDCK

>pET #157, Residues 157-220/1-157

MGFRIYRETLSRFSCAAQVKLVQRDDDKEETVRHRYKVYLEKTQPVIDYYGKKGILKRVDTIGIDNVVAEVLKII  
GWSDKAAAMMAYLVFLGPPGAGKGTAKRIQEKTGIPHISTGDI FRDIVKKENDELGKKIKEIMEKGELVPDELVNE  
VVKRRLSEKDCEKGFILDGYPRTVAQAEFLDSFLESQNKQLTAAVLFDVDPEDVVVQRLTSRRICPKCGRIYNMISL  
PPKEDELCDCKV

>pET #179, Residues 179-220/1-179

MNLEKTQPVIDYYGKKGILKRVDGTIGIDNVVAEVLKIIIGWSDKAAAMMAYLVFLGPPGAGKGTYAKRIQEKTGIPH  
ISTGDI FRDIVKKENDELGKKIKEIMEKGELVPDELVNEVVKRRLSEKDCEKGFILDGYPRTVAQAEFLDSFLESQN  
KQLTAAVLFVDPEDVVVQRLTSRRICPKCGRIYNMISLPPKEDEL CDDCKVKLVQRDDDKEETVRHRYKVYL

>pET #179, Residues 179-220/1-179

MGFRIYRETL SRFSCAAQLEKTQPVIDYYGKKGILKRVDGTIGIDNVVAEVLKIIIGWSDKAAAMMAYLVFLGPPGAG  
KGTYAKRIQEKTGIPHISTGDI FRDIVKKENDELGKKIKEIMEKGELVPDELVNEVVKRRLSEKDCEKGFILDGYP  
RTVAQAEFLDSFLESQNKQLTAAVLFVDPEDVVVQRLTSRRICPKCGRIYNMISLPPKEDEL CDDCKVKLVQRDDDKE  
ETVRHRYKVYLD

>pET #190, Residues 190-220/1-190

MNGKKGILKRVDGTIGIDNVVAEVLKIIIGWSDKAAAMMAYLVFLGPPGAGKGTYAKRIQEKTGIPHISTGDI FRDIV  
KKENDELGKKIKEIMEKGELVPDELVNEVVKRRLSEKDCEKGFILDGYPRTVAQAEFLDSFLESQNKQLTAAVLFV  
DPEDVVVQRLTSRRICPKCGRIYNMISLPPKEDEL CDDCKVKLVQRDDDKEETVRHRYKVYLEKTQPVIDYYG

>pET #190, Residues 190-220/1-190

MGFRIYRETL SRFSCAAQGKKGILKRVDGTIGIDNVVAEVLKIIIGWSDKAAAMMAYLVFLGPPGAGKGTYAKRIQEK  
TGIPHISTGDI FRDIVKKENDELGKKIKEIMEKGELVPDELVNEVVKRRLSEKDCEKGFILDGYPRTVAQAEFLDSF  
LESQNKQLTAAVLFVDPEDVVVQRLTSRRICPKCGRIYNMISLPPKEDEL CDDCKVKLVQRDDDKEETVRHRYKVYL  
EKTQPVIDYYGT

>pET #209, Residues 209-220/1-209

MIAEVLKIIIGWSDKAAAMMAYLVFLGPPGAGKGTYAKRIQEKTGIPHISTGDI FRDIVKKENDELGKKIKEIMEKGE  
LVPDELVNEVVKRRLSEKDCEKGFILDGYPRTVAQAEFLDSFLESQNKQLTAAVLFVDPEDVVVQRLTSRRICPKCG  
RIYNMISLPPKEDEL CDDCKVKLVQRDDDKEETVRHRYKVYLEKTQPVIDYYGKKGILKRVDGTIGIDNVVA

>pET #209, Residues 209-220/1-209

MGFRIYRETL SRFSCAAQAEVLKIIIGWSDKAAAMMAYLVFLGPPGAGKGTYAKRIQEKTGIPHISTGDI FRDIVKKE  
NDELGKKIKEIMEKGELVPDELVNEVVKRRLSEKDCEKGFILDGYPRTVAQAEFLDSFLESQNKQLTAAVLFVDPED  
VVVQRLTSRRICPKCGRIYNMISLPPKEDEL CDDCKVKLVQRDDDKEETVRHRYKVYLEKTQPVIDYYGKKGILKR  
VDGTIGIDNVVAD

>pET #217, Residues 217-220/1-217

MRWSDKAAAMMAYLVFLGPPGAGKGTYAKRIQEKTGIPHISTGDI FRDIVKKENDELGKKIKEIMEKGELVPDELVN  
EVVKRRLSEKDCEKGFILDGYPRTVAQAEFLDSFLESQNKQLTAAVLFVDPEDVVVQRLTSRRICPKCGRIYNMISL  
PPKEDEL CDDCKVKLVQRDDDKEETVRHRYKVYLEKTQPVIDYYGKKGILKRVDGTIGIDNVVAEVLKIIIGW

>pET #217, Residues 217-220/1-217

MGFRIYRETL SRFSCAAQWSDKAAAMMAYLVFLGPPGAGKGTYAKRIQEKTGIPHISTGDI FRDIVKKENDELGKKI  
KEIMEKGELVPDELVNEVVKRRLSEKDCEKGFILDGYPRTVAQAEFLDSFLESQNKQLTAAVLFVDPEDVVVQRLTS  
RRICPKCGRIYNMISLPPKEDEL CDDCKVKLVQRDDDKEETVRHRYKVYLEKTQPVIDYYGKKGILKRVDGTIGIDN  
VVAEVLKIIIGWS

## **Rationally designed pET vectors (fission within Peptides I-V)**

>pET #12, Residues 12-220/1-12

MTGAGKGTYAKRIQEKTGIPHISTGDI FRDIVKKENDELGKKIKEIMEKGELVPDELVNEVVKRRLSEKDCEKGFIL  
DGYPRTVAQAEFLDSFLESQNKQLTAAVLFVDPEDVVVQRLTSRRICPKCGRIYNMISLPPKEDEL CDDCKVKLVQR  
DDDKEETVRHRYKVYLEKTQPVIDYYGKKGILKRVDGTIGIDNVVAEVLKIIIGWSDKAAAMMAYLVFLGPPG

>pET #12, Residues 12-220/1-12

MGFRIYRETL SRFSCAAQGAGKGTYAKRIQEKTGIPHISTGDI FRDIVKKENDELGKKIKEIMEKGELVPDELVNEV  
VKRRLSEKDCEKGFILDGYPRTVAQAEFLDSFLESQNKQLTAAVLFVDPEDVVVQRLTSRRICPKCGRIYNMISLPP  
KEDEL CDDCKVKLVQRDDDKEETVRHRYKVYLEKTQPVIDYYGKKGILKRVDGTIGIDNVVAEVLKIIIGWSDKAAAM  
MAYLVFLGPPGA

>pET #15, Residues 15-220/1-15

MRKGTYAKRIQEKTGIPHISTGDI FRDIVKKENDELGKKIKEIMEKGELVPDELVNEVVKRRRLSEKDCEKGFILDGY  
PRTVAQAEFLDSFLESQNKQLTAAVLFDPEDVVVQRLTSRRICPKCGRIYNMISLPPKEDEL CDDCKVKLVQRDDD  
KEETVRHRYKVYLEKTQPVIDYYGKKGILKRVDTIGIDNVVAEVLKIIIGWSDKAAAMMAYLVFLGPPGAGK

>pET #15, Residues 15-220/1-15

MGFRIYRETLSRFSCAAQKGTYAKRIQEKTGIPHISTGDI FRDIVKKENDELGKKIKEIMEKGELVPDELVNEVVKRR  
RLSEKDCEKGFILDGY PRTVAQAEFLDSFLESQNKQLTAAVLFDPEDVVVQRLTSRRICPKCGRIYNMISLPPKED  
ELCDDCKVKLVQRDDDKEETVRHRYKVYLEKTQPVIDYYGKKGILKRVDTIGIDNVVAEVLKIIIGWSDKAAAMMAY  
LVFLGPPGAGKG

>pET #59, Residues 59-220/1-59

MKGELVPDELVNEVVKRRRLSEKDCEKGFILDGY PRTVAQAEFLDSFLESQNKQLTAAVLFDPEDVVVQRLTSRRIC  
PKCGRIYNMISLPPKEDEL CDDCKVKLVQRDDDKEETVRHRYKVYLEKTQPVIDYYGKKGILKRVDTIGIDNVVAAE  
VLKIIIGWSDKAAAMMAYLVFLGPPGAGKGTYAKRIQEKTGIPHISTGDI FRDIVKKENDELGKKIKEIMEKG

>pET #59, Residues 59-220/1-59

MGFRIYRETLSRFSCAAQGELVPDELVNEVVKRRRLSEKDCEKGFILDGY PRTVAQAEFLDSFLESQNKQLTAAVLFDP  
VEDVVVQRLTSRRICPKCGRIYNMISLPPKEDEL CDDCKVKLVQRDDDKEETVRHRYKVYLEKTQPVIDYYGKKGI  
LKRVDGTIGIDNVVAEVLKIIIGWSDKAAAMMAYLVFLGPPGAGKGTYAKRIQEKTGIPHISTGDI FRDIVKKENDEL  
GKKIKEIMEKGD

>pET #62, Residues 62-220/1-62

MMVPDELVNEVVKRRRLSEKDCEKGFILDGY PRTVAQAEFLDSFLESQNKQLTAAVLFDPEDVVVQRLTSRRICPKC  
GRIYNMISLPPKEDEL CDDCKVKLVQRDDDKEETVRHRYKVYLEKTQPVIDYYGKKGILKRVDTIGIDNVVAEVLK  
IIIGWSDKAAAMMAYLVFLGPPGAGKGTYAKRIQEKTGIPHISTGDI FRDIVKKENDELGKKIKEIMEKGELV

>pET #62, Residues 62-220/1-62

MGFRIYRETLSRFSCAAQVPDELVNEVVKRRRLSEKDCEKGFILDGY PRTVAQAEFLDSFLESQNKQLTAAVLFDPVE  
DVVVQRLTSRRICPKCGRIYNMISLPPKEDEL CDDCKVKLVQRDDDKEETVRHRYKVYLEKTQPVIDYYGKKGILKR  
VDGTIGIDNVVAAEVLKIIIGWSDKAAAMMAYLVFLGPPGAGKGTYAKRIQEKTGIPHISTGDI FRDIVKKENDELGKK  
IKEIMEKGELVP

>pET #85, Residues 85-220/1-85

MIILDGY PRTVAQAEFLDSFLESQNKQLTAAVLFDPEDVVVQRLTSRRICPKCGRIYNMISLPPKEDEL CDDCKVK  
LVQRDDDKEETVRHRYKVYLEKTQPVIDYYGKKGILKRVDTIGIDNVVAAEVLKIIIGWSDKAAAMMAYLVFLGPPGA  
GKGTYAKRIQEKTGIPHISTGDI FRDIVKKENDELGKKIKEIMEKGELVPDELVNEVVKRRRLSEKDCEKGF I

>pET #85, Residues 85-220/1-85

MGFRIYRETLSRFSCAAQILDGY PRTVAQAEFLDSFLESQNKQLTAAVLFDPEDVVVQRLTSRRICPKCGRIYNMI  
SLPPKEDEL CDDCKVKLVQRDDDKEETVRHRYKVYLEKTQPVIDYYGKKGILKRVDTIGIDNVVAAEVLKIIIGWSDK  
AAAMMAYLVFLGPPGAGKGTYAKRIQEKTGIPHISTGDI FRDIVKKENDELGKKIKEIMEKGELVPDELVNEVVKRR  
LSEKDCEKGFIL

>pET #88, Residues 88-220/1-88

MNGY PRTVAQAEFLDSFLESQNKQLTAAVLFDPEDVVVQRLTSRRICPKCGRIYNMISLPPKEDEL CDDCKVKLVQ  
RDDDKEETVRHRYKVYLEKTQPVIDYYGKKGILKRVDTIGIDNVVAAEVLKIIIGWSDKAAAMMAYLVFLGPPGAGK  
TYAKRIQEKTGIPHISTGDI FRDIVKKENDELGKKIKEIMEKGELVPDELVNEVVKRRRLSEKDCEKGFILDG

>pET #88, Residues 88-220/1-88

MGFRIYRETLSRFSCAAQGY PRTVAQAEFLDSFLESQNKQLTAAVLFDPEDVVVQRLTSRRICPKCGRIYNMISLP  
PKEDEL CDDCKVKLVQRDDDKEETVRHRYKVYLEKTQPVIDYYGKKGILKRVDTIGIDNVVAAEVLKIIIGWSDKAAA  
MMAYLVFLGPPGAGKGTYAKRIQEKTGIPHISTGDI FRDIVKKENDELGKKIKEIMEKGELVPDELVNEVVKRRRLSE  
KDCEKGFILDGY

>pET #125, Residues 125-220/1-125  
MIQRLTSRRICPKCGRIYNMISLPPKEDELCDCKVKLVQRDDDKEETVRHRYKVYLEKTQPVIDYYGKKGILKRVD  
GTIGIDNVVAEVLKIIIGWSDKAAAMMAYLVFLGPPGAGKGTYAKRIQEKTGIPHISTGDI FRDIVKKENDELGKKIK  
EIMEKGELVPDELVNEVVKRRLSEKDCEKGFILDGYPRTVAQAEFLDSFLESQNKQLTAAVLFVDPEDVVVQ

>pET #125, Residues 125-220/1-125  
MGFRIYRETLRFSCAAQRLTSRRICPKCGRIYNMISLPPKEDELCDCKVKLVQRDDDKEETVRHRYKVYLEKTQ  
PVIDYYGKKGILKRVDGTIGIDNVVAEVLKIIIGWSDKAAAMMAYLVFLGPPGAGKGTYAKRIQEKTGIPHISTGDI  
FRDIVKKENDELGKKIKEIMEKGELVPDELVNEVVKRRLSEKDCEKGFILDGYPRTVAQAEFLDSFLESQNKQLTAAV  
LFDVPEDVVVQS

>pET #127, Residues 127-220/1-127  
MRLTSRRICPKCGRIYNMISLPPKEDELCDCKVKLVQRDDDKEETVRHRYKVYLEKTQPVIDYYGKKGILKRVDGT  
IGIDNVVAEVLKIIIGWSDKAAAMMAYLVFLGPPGAGKGTYAKRIQEKTGIPHISTGDI FRDIVKKENDELGKKIK  
EIMEKGELVPDELVNEVVKRRLSEKDCEKGFILDGYPRTVAQAEFLDSFLESQNKQLTAAVLFVDPEDVVVQRL

>pET #127, Residues 127-220/1-127  
MGFRIYRETLRFSCAAQLTSRRICPKCGRIYNMISLPPKEDELCDCKVKLVQRDDDKEETVRHRYKVYLEKTQP  
VIDYYGKKGILKRVDGTIGIDNVVAEVLKIIIGWSDKAAAMMAYLVFLGPPGAGKGTYAKRIQEKTGIPHISTGDI  
FRDIVKKENDELGKKIKEIMEKGELVPDELVNEVVKRRLSEKDCEKGFILDGYPRTVAQAEFLDSFLESQNKQLTAAV  
LFDVPEDVVVQRLT

>pET #165, Residues 165-220/1-165  
MNDKEETVRHRYKVYLEKTQPVIDYYGKKGILKRVDGTIGIDNVVAEVLKIIIGWSDKAAAMMAYLVFLGPPGAGK  
GTYAKRIQEKTGIPHISTGDI FRDIVKKENDELGKKIKEIMEKGELVPDELVNEVVKRRLSEKDCEKGFILDGYPRT  
VAQAEFLDSFLESQNKQLTAAVLFVDPEDVVVQRLTSRRICPKCGRIYNMISLPPKEDELCDCKVKLVQRDD

>pET #165, Residues 165-220/1-165  
MGFRIYRETLRFSCAAQDKEETVRHRYKVYLEKTQPVIDYYGKKGILKRVDGTIGIDNVVAEVLKIIIGWSDKAA  
MAYLVFLGPPGAGKGTYAKRIQEKTGIPHISTGDI FRDIVKKENDELGKKIKEIMEKGELVPDELVNEVVKRRLSE  
KDCEKGFILDGYPRTVAQAEFLDSFLESQNKQLTAAVLFVDPEDVVVQRLTSRRICPKCGRIYNMISLPPKEDELCD  
CKVKLVQRDDD

>pET #168, Residues 168-220/1-168  
MKEETVRHRYKVYLEKTQPVIDYYGKKGILKRVDGTIGIDNVVAEVLKIIIGWSDKAAAMMAYLVFLGPPGAGKGT  
YAKRIQEKTGIPHISTGDI FRDIVKKENDELGKKIKEIMEKGELVPDELVNEVVKRRLSEKDCEKGFILDGYPRTVA  
QAEFLDSFLESQNKQLTAAVLFVDPEDVVVQRLTSRRICPKCGRIYNMISLPPKEDELCDCKVKLVQRDDDKE

>pET #168, Residues 168-220/1-168  
MGFRIYRETLRFSCAAQETVRHRYKVYLEKTQPVIDYYGKKGILKRVDGTIGIDNVVAEVLKIIIGWSDKAAAM  
MAYLVFLGPPGAGKGTYAKRIQEKTGIPHISTGDI FRDIVKKENDELGKKIKEIMEKGELVPDELVNEVVKRRLSE  
KDCEKGFILDGYPRTVAQAEFLDSFLESQNKQLTAAVLFVDPEDVVVQRLTSRRICPKCGRIYNMISLPPKEDELCD  
CKVKLVQRDDDKE

### **Rationally designed pET vectors (fission outside Peptides I-V)**

>pET #28, Residues 28-220/1-28  
MSIPHISTGDI FRDIVKKENDELGKKIKEIMEKGELVPDELVNEVVKRRLSEKDCEKGFILDGYPRTVAQAEFLDS  
FLESQNKQLTAAVLFVDPEDVVVQRLTSRRICPKCGRIYNMISLPPKEDELCDCKVKLVQRDDDKEETVRHRYKVYL  
EKTQPVIDYYGKKGILKRVDGTIGIDNVVAEVLKIIIGWSDKAAAMMAYLVFLGPPGAGKGTYAKRIQEKTI

>pET #40, Residues 40-220/1-40  
MNIKKENDELGKKIKEIMEKGELVPDELVNEVVKRRLSEKDCEKGFILDGYPRTVAQAEFLDSFLESQNKQLTAAV  
LFDVPEDVVVQRLTSRRICPKCGRIYNMISLPPKEDELCDCKVKLVQRDDDKEETVRHRYKVYLEKTQPVIDYYG  
KILKRVDGTIGIDNVVAEVLKIIIGWSDKAAAMMAYLVFLGPPGAGKGTYAKRIQEKTGIPHISTGDI FRDI

>pET #50, Residues 50-220/1-50

MRKKIKEIMEKGELVPDELVNEVVKRRLSEKDCEKGFILDGYPRVAQAEFLDSFLESQNKQLTAAVLFDPEDVVV  
QRLTSRRICPKCGRIYNMISLPPKEDELCDCKVKLVQRDDDKEETVRHRYKVYLEKTQPVIDYYGKKGILKRVDGT  
IGIDNVVAEVLKIIIGWSDKAAAMMAYLVFLGPPGAGKGTAKRIQEKTGIPHISTGDI FRDIVKKENDELGK

>pET #73, Residues 73-220/1-73

MKRRLSEKDCEKGFILDGYPRVAQAEFLDSFLESQNKQLTAAVLFDPEDVVVQRLTSRRICPKCGRIYNMISLPP  
KEDELCDCKVKLVQRDDDKEETVRHRYKVYLEKTQPVIDYYGKKGILKRVDGTIGIDNVVAEVLKIIIGWSDKAAAM  
MAYLVFLGPPGAGKGTAKRIQEKTGIPHISTGDI FRDIVKKENDELGKKIKEIMEKGELVPDELVNEVVKR

>pET #98, Residues 98-220/1-98

MKFLDSFLESQNKQLTAAVLFDPEDVVVQRLTSRRICPKCGRIYNMISLPPKEDELCDCKVKLVQRDDDKEETVR  
HRYKVYLEKTQPVIDYYGKKGILKRVDGTIGIDNVVAEVLKIIIGWSDKAAAMMAYLVFLGPPGAGKGTAKRIQEK  
TGIPHISTGDI FRDIVKKENDELGKKIKEIMEKGELVPDELVNEVVKRRLSEKDCEKGFILDGYPRVAQAEF

>pET #110, Residues 110-220/1-110

MKLTAAVLFDPEDVVVQRLTSRRICPKCGRIYNMISLPPKEDELCDCKVKLVQRDDDKEETVRHRYKVYLEKTQP  
VIDYYGKKGILKRVDGTIGIDNVVAEVLKIIIGWSDKAAAMMAYLVFLGPPGAGKGTAKRIQEKTGIPHISTGDI FR  
DIVKKENDELGKKIKEIMEKGELVPDELVNEVVKRRLSEKDCEKGFILDGYPRVAQAEFLDSFLESQNKQL

>pET #154, Residues 154-220/1-154

MSDDCKVKLVQRDDDKEETVRHRYKVYLEKTQPVIDYYGKKGILKRVDGTIGIDNVVAEVLKIIIGWSDKAAAMMAYL  
VFLGPPGAGKGTAKRIQEKTGIPHISTGDI FRDIVKKENDELGKKIKEIMEKGELVPDELVNEVVKRRLSEKDCEK  
GFILDGYPRVAQAEFLDSFLESQNKQLTAAVLFDPEDVVVQRLTSRRICPKCGRIYNMISLPPKEDELCD

>pET #185, Residues 185-220/1-185

MTVIDYYGKKGILKRVDGTIGIDNVVAEVLKIIIGWSDKAAAMMAYLVFLGPPGAGKGTAKRIQEKTGIPHISTGDI  
FRDIVKKENDELGKKIKEIMEKGELVPDELVNEVVKRRLSEKDCEKGFILDGYPRVAQAEFLDSFLESQNKQLTAA  
VLFDPEDVVVQRLTSRRICPKCGRIYNMISLPPKEDELCDCKVKLVQRDDDKEETVRHRYKVYLEKTQP

>pET #194, Residues 194-220/1-194

MSILKRVDGTIGIDNVVAEVLKIIIGWSDKAAAMMAYLVFLGPPGAGKGTAKRIQEKTGIPHISTGDI FRDIVKKEN  
DELGKKIKEIMEKGELVPDELVNEVVKRRLSEKDCEKGFILDGYPRVAQAEFLDSFLESQNKQLTAAVLFDPEDV  
VVQRLTSRRICPKCGRIYNMISLPPKEDELCDCKVKLVQRDDDKEETVRHRYKVYLEKTQPVIDYYGKKGI

>pET #205, Residues 205-220/1-205

MIDNVVAEVLKIIIGWSDKAAAMMAYLVFLGPPGAGKGTAKRIQEKTGIPHISTGDI FRDIVKKENDELGKKIKEIM  
KELVPDELVNEVVKRRLSEKDCEKGFILDGYPRVAQAEFLDSFLESQNKQLTAAVLFDPEDVVVQRLTSRRIC  
PKCGRIYNMISLPPKEDELCDCKVKLVQRDDDKEETVRHRYKVYLEKTQPVIDYYGKKGILKRVDGTIGID
